# Supplementary material for: Single-Crystal X-ray Diffraction Analysis of Inclusion Complexes of Triflate-Functionalized Pillar[5]arenes with 1,4-Dibromobutane and n-Hexane Guests
Source: MDPI journal article supplement (doi:10.3390/cryst13040593), 2023-03-31

# Single crystal X-ray diffraction analysis of inclusion complexes of triflate-functionalized pillar[5]arenes with 1,4-dibromobutane and n-hexane guests

Mickey Vinodh, Shaima G. Alshammari and Talal F. Al-Azemi\*

## Table of contents

|                                                                                                                                                   |     |
|---------------------------------------------------------------------------------------------------------------------------------------------------|-----|
| Thermal Ellipsoid representation of <b>Pil_TF1_ButBr2</b>                                                                                         | S2  |
| Thermal Ellipsoid representation of <b>Pil_TF1_Hex</b>                                                                                            | S3  |
| Thermal Ellipsoid representation of <b>Pil_TF2_ButBr2</b>                                                                                         | S4  |
| Thermal Ellipsoid representation of <b>Pil_TF2_Hex</b>                                                                                            | S5  |
| <b>Table S1:</b> Non-bonding interactions between Pillararene host and dibromobutane guest in the <b>Pil_TF2_ButBr2</b> crystals                  | S6  |
| <b>Table S2:</b> Non-bonding interactions between Pillararene host and n-Hexane guest in the <b>Pil_TF2_Hex</b> crystals                          | S6  |
| <b>Table S3:</b> Non-bonding interactions between Pillararene host and dibromobutane guest in the <b>Pil_TF1_ButBr2</b> crystals                  | S7  |
| <b>Table S4:</b> Non-bonding interactions between Pillararene host and n-Hexane guest in the <b>Pil_TF2_Hex</b> crystals                          | S7  |
| <b>Table S5:</b> Intermolecular non-bonding interactions (shorter than the sum of van der Waals radii) in the <b>Pil_TF1_ButBr2</b> crystals      | S8  |
| <b>Table S6:</b> Intermolecular non-bonding interactions (shorter than the sum of van der Waals radii) in the <b>Pil_TF1_Hex</b> crystals         | S8  |
| Crystal network showing linear pillararene chain of <b>Pil_TF1_Hex</b> as well as linear array constituting cofacial dimers of <b>Pil_TF2_Hex</b> | S9  |
| Hirshfeld surfaces (mapped with dnorm) of the <b>Pil_TF1_ButBr2</b> and <b>Pil_TF1_Hex</b> crystals.                                              | S9  |
| CheckCIF of <b>Pil_TF1_ButBr2</b>                                                                                                                 | S10 |
| CheckCIF of <b>Pil_TF1_Hex</b>                                                                                                                    | S14 |
| CheckCIF of <b>Pil_TF2_ButBr2</b>                                                                                                                 | S18 |
| CheckCIF of <b>Pil_TF2_Hex</b>                                                                                                                    | S23 |

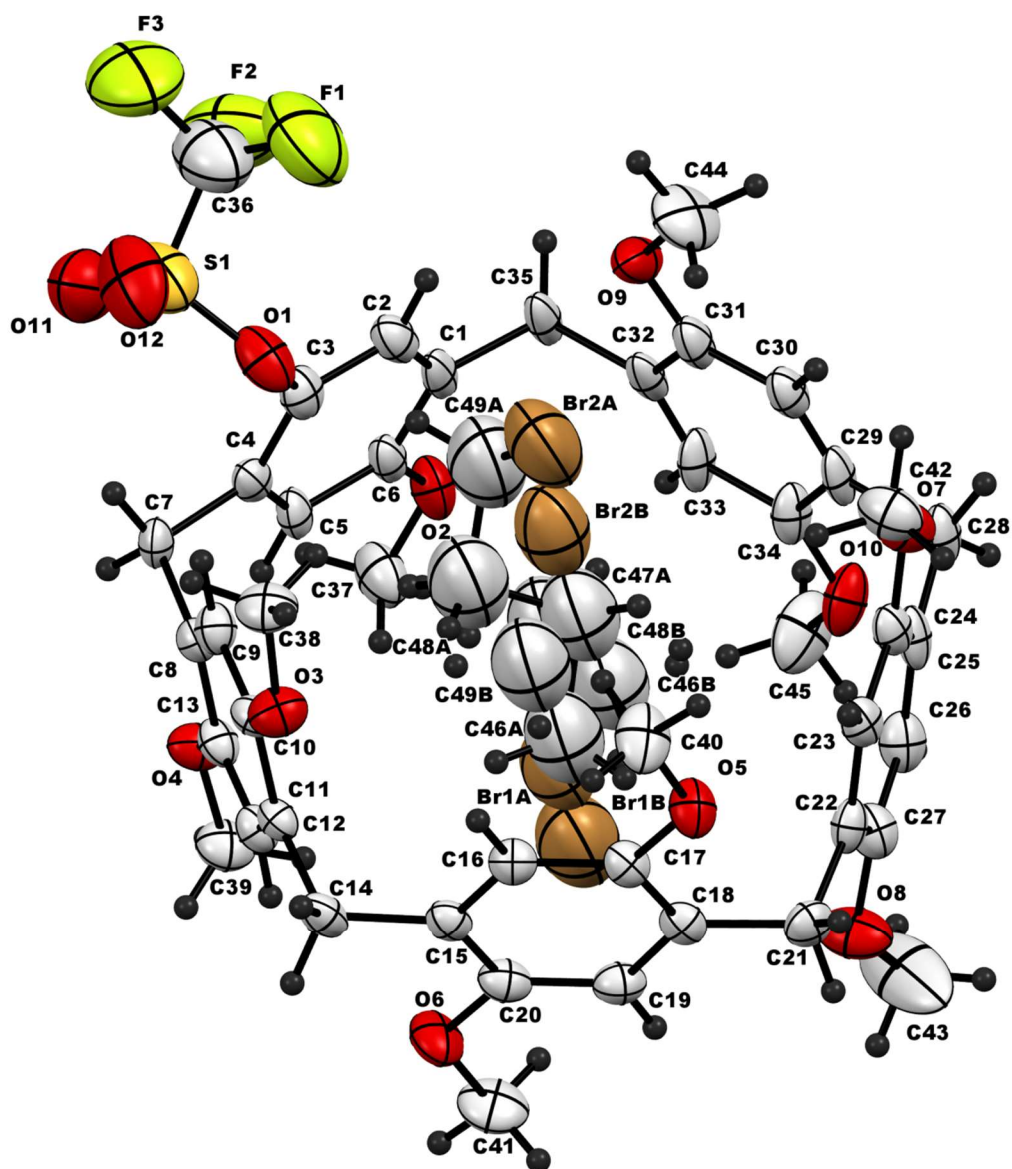

Figure S1: Thermal Ellipsoid representation (30%probability) of **Pil\_TF1\_ButBr2**

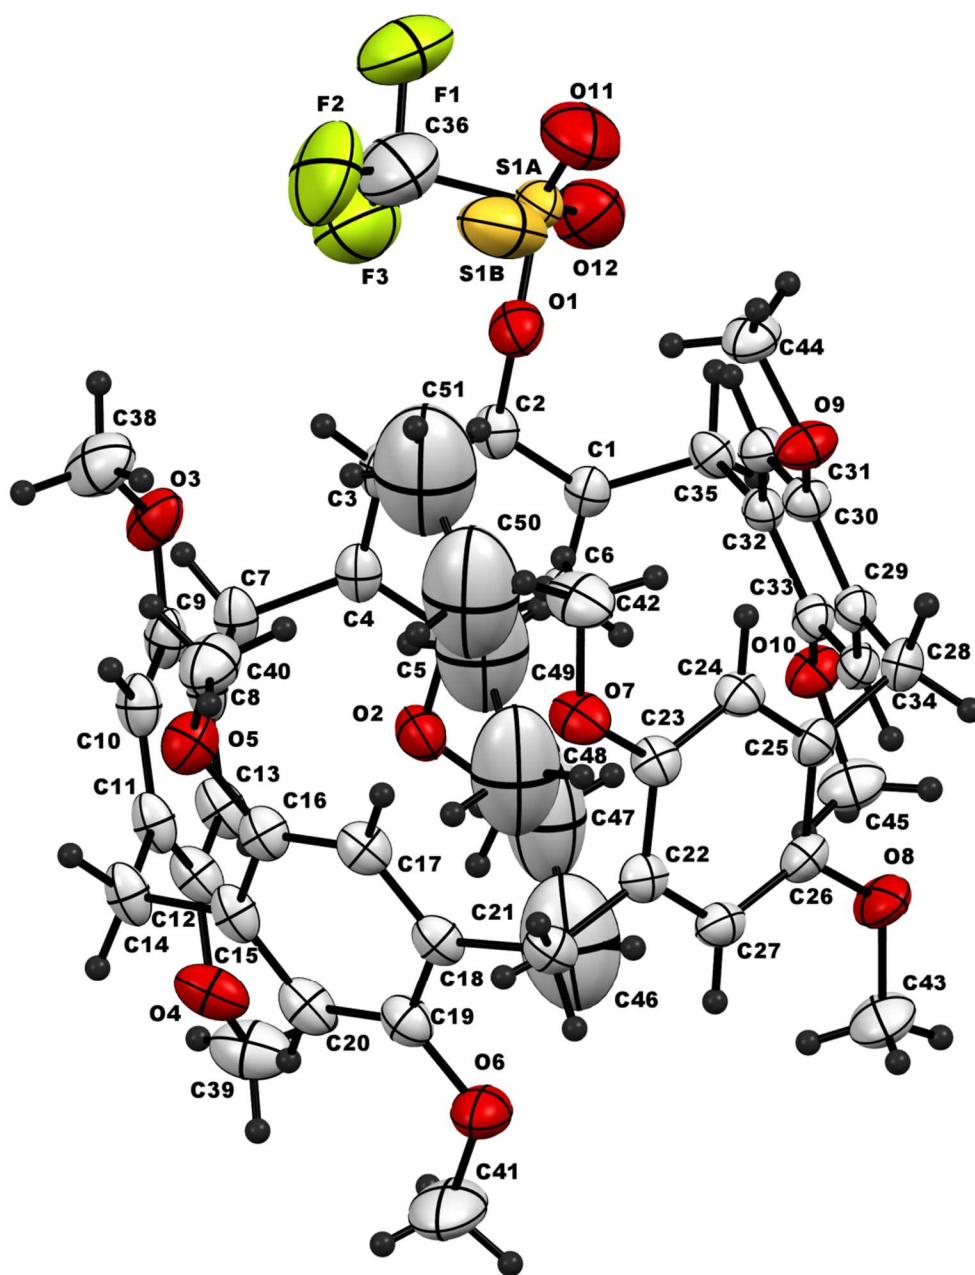

Figure S2: Thermal Ellipsoid representation (30%probability) of **Pil\_TF1\_Hex**

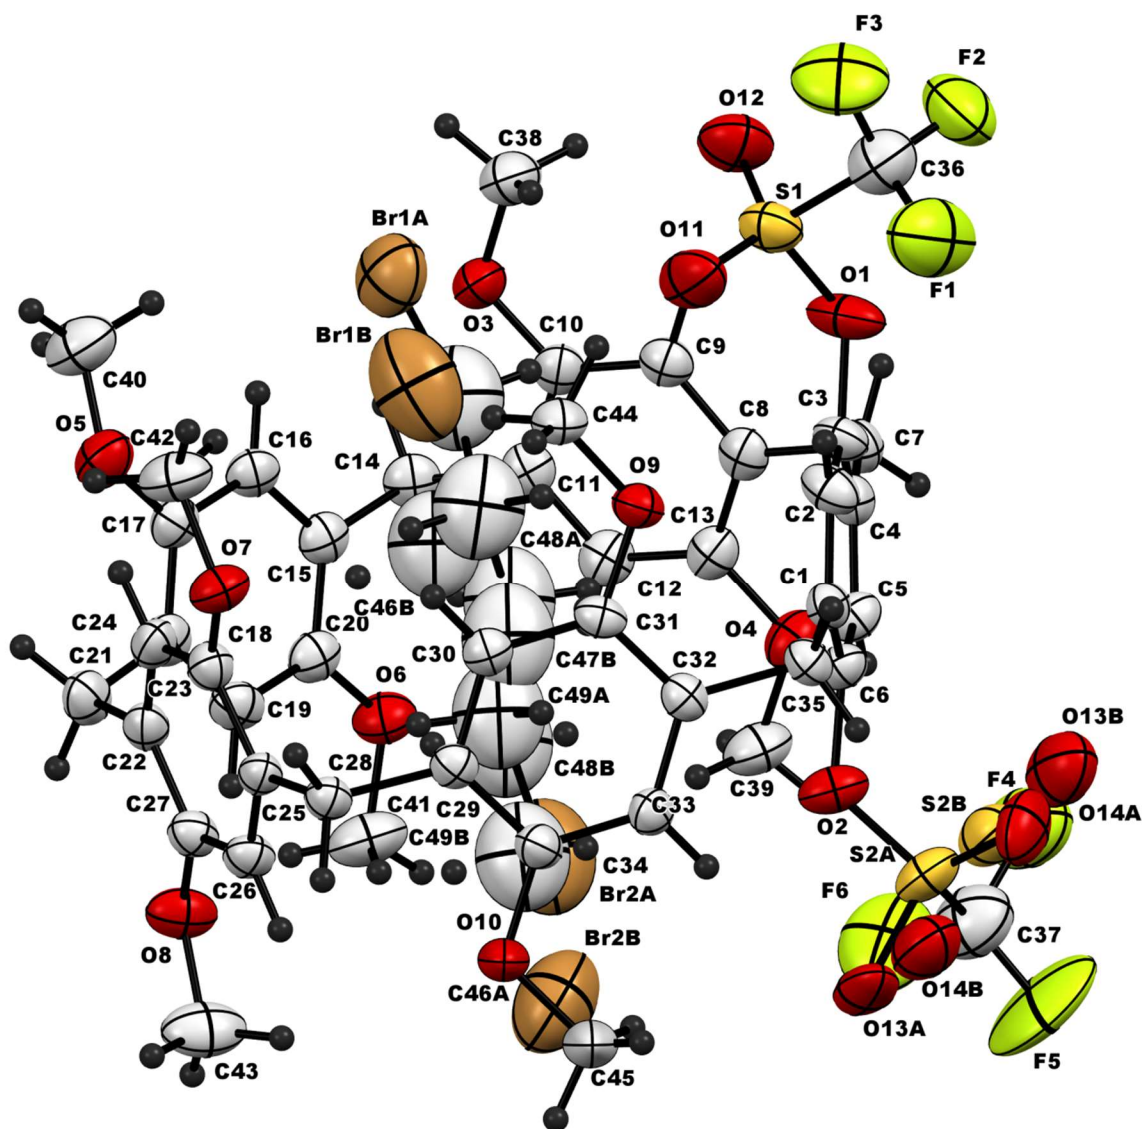

Figure S3: Thermal Ellipsoid representation (30%probability) of **Pil\_TF2\_ButBr2**

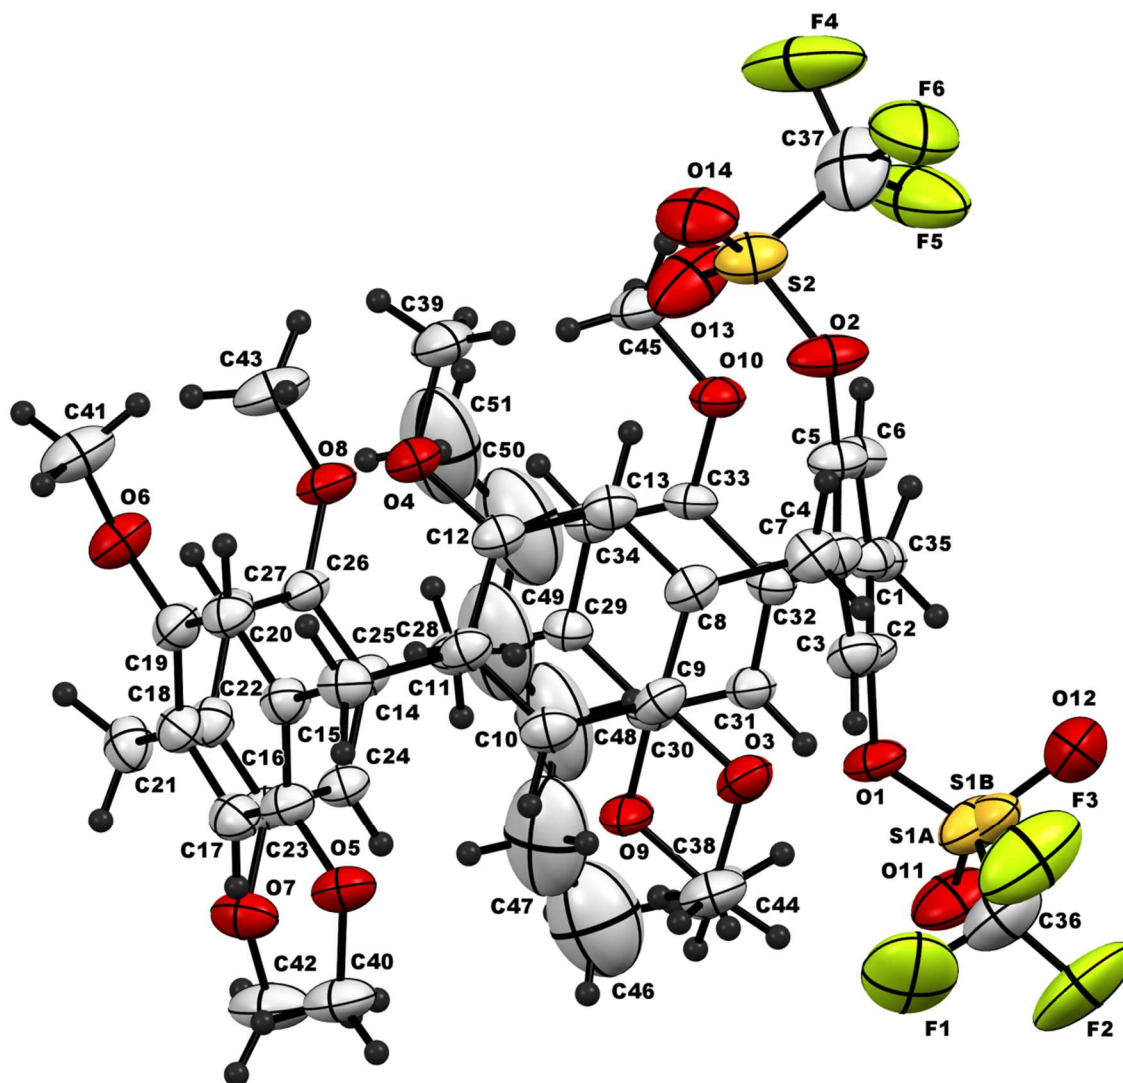

Figure S4: Thermal Ellipsoid representation (30%probability) of **Pil\_TF2\_Hex**

**Table S1:** Non-bonding interactions between Pillararene host and dibromobutane guest in the **Pil\_TF2\_ButBr2** crystals ( Å, °).

| A-B...C         | A-B  | B...C | B...C   | A-B...C |
|-----------------|------|-------|---------|---------|
| C46A-H46A...O3  | 0.97 | 2.946 | 3.39(2) | 109     |
| C46A-H46B...O3  | 0.97 | 2.970 | 3.39(2) | 108     |
| C47A-H47A...O7  | 0.97 | 3.417 | 4.36(2) | 164     |
| C47A-H47B...O9  | 0.97 | 2.940 | 3.82(2) | 151     |
| C48A-H48A...Cg3 | 0.97 | 2.967 | 3.898   | 160.97  |
| C48A-H48B...Cg2 | 0.97 | 3.402 | 3.654   | 121.00  |
| C49A-H49A...Cg4 | 0.97 | 2.802 | 3.756   | 168.40  |
| C49A-H49B...Cg5 | 0.97 | 2.743 | 3.648   | 155.59  |

Cg2 - Cg5 are the centroid of the pillararene phenyl rings constitute C8-C13, C15-C20, C22-27 and C29-C34 respectively

**Table S2:** Non-bonding interactions between Pillararene host and n-Hexane guest in the **Pil\_TF2\_Hex** crystals ( Å, °).

| A-B...C         | A-B  | B...C | B...C   | A-B...C |
|-----------------|------|-------|---------|---------|
| C46-H46B...O9   | 0.96 | 3.201 | 3.91(2) | 132     |
| C46-H46C...O1   | 0.96 | 2.985 | 3.85(2) | 150     |
| C47-H47A...O5   | 0.97 | 3.455 | 4.10(2) | 126     |
| C47-H47B...O3   | 0.97 | 3.573 | 4.50(2) | 162     |
| C48-H48A...Cg4  | 0.97 | 3.209 | 3.981   | 137.73  |
| C48-H48B...O1   | 0.97 | 2.959 | 3.84(2) | 151.2   |
| C49-H49A...Cg3  | 0.97 | 2.889 | 3.646   | 135.63  |
| C49-H49B...Cg2  | 0.97 | 2.969 | 3.903   | 161.77  |
| C50-H50A...O10  | 0.97 | 3.193 | 3.84(2) | 125     |
| C50-H50B... Cg1 | 0.97 | 3.163 | 4.049   | 152.59  |
| C51-H51A...O13  | 0.96 | 2.898 | 3.55(2) | 126.3   |
| C51-H51B...O6   | 0.96 | 3.128 | 3.98(2) | 149.0   |
| C51-H51C...O4   | 0.96 | 2.925 | 3.88(2) | 174.0   |

Cg1 - Cg4 are the centroid of the pillararene phenyl rings constitute C1-C6, C8-C13, C15-C20 and C22-27 respectively

**Table S3:** Non-bonding interactions between Pillararene host and dibromobutane guest in the **Pil\_TF1\_ButBr2** crystals ( Å, °).

| A-B...C          | A-B  | B...C | B...C   | A-B...C |
|------------------|------|-------|---------|---------|
| C46A-H46A...Cg2  | 0.97 | 3.212 | 4.076   | 149.30  |
| C46A-H46B... Cg3 | 0.97 | 2.762 | 3.298   | 115.51  |
| C47A-H47A... Cg5 | 0.97 | 2.865 | 3.743   | 151.38  |
| C47A-H47B... Cg4 | 0.97 | 3.325 | 3.936   | 122.64  |
| C48A-H48A...O3   | 0.97 | 3.012 | 3.88(4) | 149     |
| C48A-H48B... Cg1 | 0.97 | 2.957 | 3.656   | 129.71  |
| C49A-H49A... O1  | 0.97 | 2.102 | 3.05(3) | 164     |
| C49A-H49B... O9  | 0.97 | 2.674 | 3.58(5) | 156     |

Cg1 - Cg5 are the centroid of the pillararene phenyl rings constitute C1-C6, C8-C13, C15-C20, C22-27 and C29-C34 respectively

**Table S4:** Non-bonding interactions between Pillararene host and n-Hehane guest in the **Pil\_TF2\_Hex** crystals ( Å, °).

| A-B...C         | A-B  | B...C | B...C   | A-B...C |
|-----------------|------|-------|---------|---------|
| C46-H46B...O8   | 0.96 | 3.263 | 4.18(3) | 160     |
| C46-H46C...O6   | 0.96 | 3.222 | 3.89(2) | 128     |
| C47-H47A...O10  | 0.97 | 3.116 | 4.07(2) | 170     |
| C47-H47B...O2   | 0.97 | 3.192 | 4.00(2) | 142     |
| C48-H48A...Cg3  | 0.97 | 2.815 | 3.711   | 154.17  |
| C48-H48B... Cg4 | 0.97 | 2.781 | 3.730   | 165.59  |
| C49-H49A...Cg5  | 0.97 | 3.201 | 4.031   | 144.55  |
| C49-H49B...Cg2  | 0.97 | 3.092 | 3.959   | 149.63  |
| C50-H50A...O9   | 0.97 | 3.465 | 4.26(3) | 141     |
| C50-H50B... O5  | 0.97 | 3.153 | 4.09(2) | 162     |
| C51-H51B...O1   | 0.96 | 2.895 | 3.73(2) | 145     |
| C51-H51C...O3   | 0.96 | 3.049 | 3.99(3) | 167     |

Cg2- Cg5 are the centroid of the pillararene phenyl rings constitute C8-C13, C15-C20, C22-27 and C29-C34respectively.

**Table S5:** Intermolecular non-bonding interactions ( shorter than the sum of van der Walls radii) in the **Pil\_TF1\_ButBr2** crystals ( Å, °).

| <b>A-B...C</b>              | <b>A-B</b> | <b>B...C</b> | <b>B....C</b> | <b>A-B...C</b> |
|-----------------------------|------------|--------------|---------------|----------------|
| C36-F3...H43C <sup>i</sup>  | 1.37(3)    | 2.62         | 3.48          | 119.0          |
| C36-F3...H37B <sup>ii</sup> | 1.37(3)    | 2.73         | 3.52          | 114.0          |
| C43-43C...F3 <sup>iii</sup> | 0.96       | 2.62         | 3.37(4)       | 135.0          |
| C37-H37B...F3 <sup>iv</sup> | 0.96       | 2.73         | 3.08(2)       | 102.4          |

Symmetry code: (i) x, 1+y, 1+z; (ii) x, y, 1+z; (iii) x, -1+y, -1+z; (iv) x, y, -1+z

**Table S6:** Intermolecular non-bonding interactions ( shorter than the sum of van der Walls radii) in the **Pil\_TF1\_Hexane** crystals ( Å, °).

| <b>A-B...C</b>              | <b>A-B</b> | <b>B...C</b> | <b>B....C</b> | <b>A-B...C</b> |
|-----------------------------|------------|--------------|---------------|----------------|
| C37-H37C...F1 <sup>i</sup>  | 0.96       | 2.682        | 3.01(1)       | 100.4          |
| C36-F1...H37C <sup>ii</sup> | 1.46(2)    | 2.682        | 3.53          | 114.0          |

Symmetry code: (i) x, y, -1+z; (ii) x, y, 1+z.



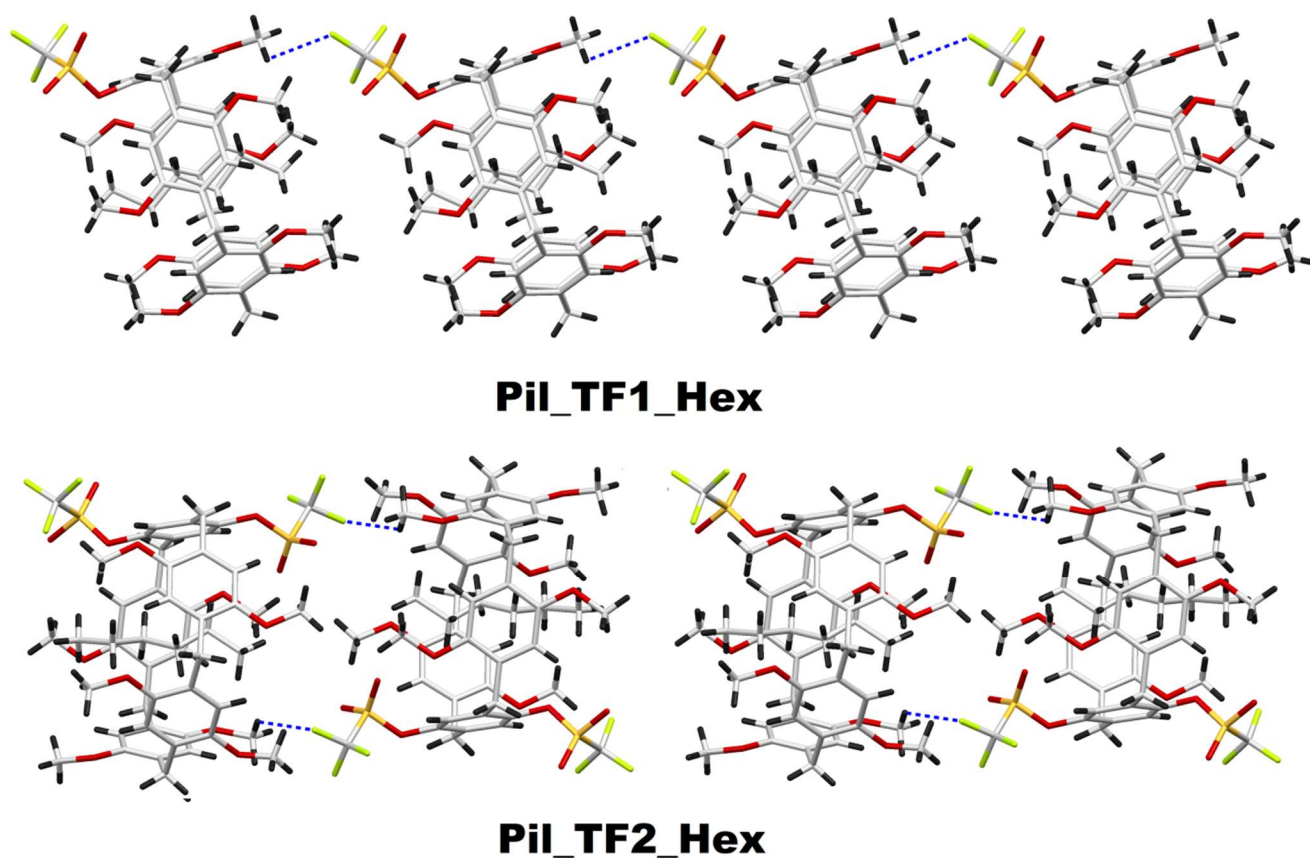

Figure S5. Crystal network showing linear pillarane chain of **Pil\_TF1\_Hex** as well as linear array constituting cofacial dimers of **Pil\_TF2\_Hex**. Both these arrangements are enabled by F...H interactions.

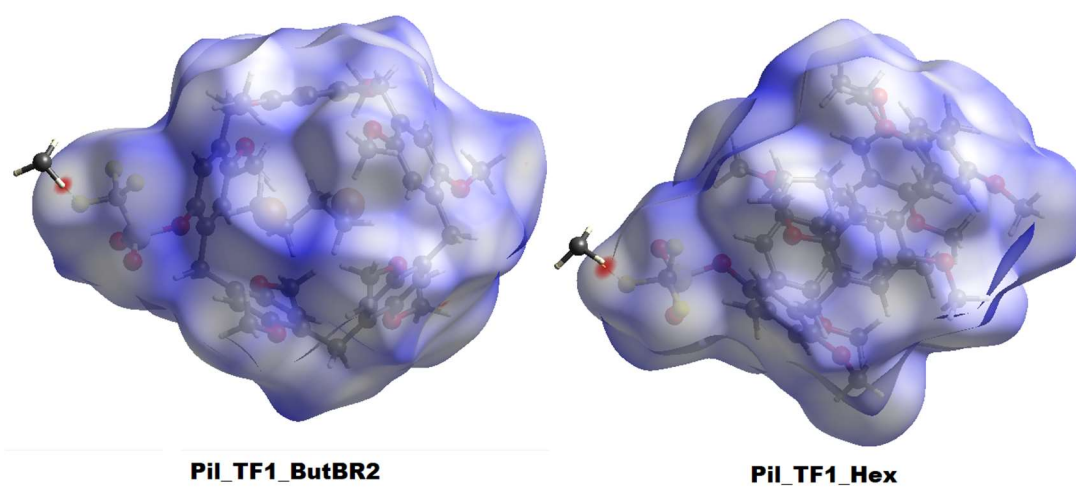

Figure S6. Hirshfeld surfaces (mapped with dnorm) of the **Pil\_TF1\_ButBr2** and **Pil\_TF1\_Hex** crystals.

# CheckCIF of Pil\_TF1\_ButBr2

## checkCIF (basic structural check) running

---

Checking for embedded fcf data in CIF ...

Found embedded fcf data in CIF. Extracting fcf data from uploaded CIF, please wait .....

## checkCIF/PLATON (basic structural check)

---

Structure factors have been supplied for datablock(s) Pil\_TF1\_ButBr2

THIS REPORT IS FOR GUIDANCE ONLY. IF USED AS PART OF A REVIEW PROCEDURE FOR PUBLICATION, IT SHOULD NOT REPLACE THE EXPERTISE OF AN EXPERIENCED CRYSTALLOGRAPHIC REFEREE.

No syntax errors found. [CIF dictionary](#)

Please wait while processing .... [Interpreting this report](#)  
[Structure factor report](#)

## Datablock: Pil\_TF1\_ButBr2

---

|                        |                                               |                      |
|------------------------|-----------------------------------------------|----------------------|
| Bond precision:        | C-C = 0.0104 Å                                | Wavelength=1.54178   |
| Cell:                  | a=36.345(4)    b=12.1749(13)    c=11.4616(13) |                      |
|                        | alpha=90    beta=90    gamma=90               |                      |
| Temperature:           | 150 K                                         |                      |
|                        | Calculated                                    | Reported             |
| Volume                 | 5071.7(10)                                    | 5071.7(10)           |
| Space group            | P n a 21                                      | P n a 21             |
| Hall group             | P 2c -2n                                      | P 2c -2n             |
| Moiety formula         | C45 H47 F3 O12 S, C4 H8 Br2                   | ?                    |
| Sum formula            | C49 H55 Br2 F3 O12 S                          | C49 H55 Br2 F3 O12 S |
| Mr                     | 1084.79                                       | 1084.81              |
| Dx, g cm <sup>-3</sup> | 1.421                                         | 1.421                |
| Z                      | 4                                             | 4                    |
| Mu (mm <sup>-1</sup> ) | 3.009                                         | 3.009                |
| F000                   | 2232.0                                        | 2232.0               |
| F000'                  | 2234.50                                       |                      |
| h, k, lmax             | 43, 14, 13                                    | 42, 14, 13           |
| Nref                   | 9011[ 4753]                                   | 7434                 |
| Tmin, Tmax             | 0.542, 0.582                                  | 0.570, 0.630         |

Tmin' 0.491  
 Correction method= # Reported T Limits: Tmin=0.570  
 Tmax=0.630 AbsCorr = MULTI-SCAN  
 Data completeness= 1.56/0.82 Theta(max)= 66.841  
 R(reflections)= 0.1162( 6869) wR2(reflections)=  
 0.3285( 7434)  
 S = 1.512 Npar= 660

The following ALERTS were generated. Each ALERT has the format  
**test-name\_ALERT\_alert-type\_alert-level**.  
 Click on the hyperlinks for more details of the test.

### ● Alert level C

**STRVA01\_ALERT\_4\_C** Flack test results are ambiguous.  
 From the CIF: \_refine\_ls\_abs\_structure\_Flack 0.330  
 From the CIF: \_refine\_ls\_abs\_structure\_Flack\_su 0.080  
**PLAT082\_ALERT\_2\_C** High R1 Value ..... 0.12 Report  
**PLAT084\_ALERT\_3\_C** High wR2 Value (i.e. > 0.25) ..... 0.33 Report  
**PLAT090\_ALERT\_3\_C** Poor Data / Parameter Ratio (Zmax > 18) ..... 7.15 Note  
**PLAT213\_ALERT\_2\_C** Atom C43 has ADP max/min Ratio ..... 3.7 prolat  
**PLAT220\_ALERT\_2\_C** NonSolvent Resd 1 C Ueq(max)/Ueq(min) Range 5.1  
 Ratio  
**PLAT222\_ALERT\_3\_C** NonSolvent Resd 1 H Uiso(max)/Uiso(min) Range 5.7  
 Ratio  
**PLAT242\_ALERT\_2\_C** Low 'MainMol' Ueq as Compared to Neighbors of 08 Check  
**PLAT260\_ALERT\_2\_C** Large Average Ueq of Residue Including Br1A 0.205 Check  
**PLAT260\_ALERT\_2\_C** Large Average Ueq of Residue Including Br1B 0.206 Check  
**PLAT341\_ALERT\_3\_C** Low Bond Precision on C-C Bonds ..... 0.0104 Ang.  
**PLAT601\_ALERT\_2\_C** Unit Cell Contains Solvent Accessible VOIDS of . 31 Ang\*\*3  
**PLAT911\_ALERT\_3\_C** Missing FCF Refl Between Thmin & STh/L= 0.596 30  
 Report  
**PLAT918\_ALERT\_3\_C** Reflection(s) with I(obs) much Smaller I(calc) . 2 Check  
**PLAT977\_ALERT\_2\_C** Check Negative Difference Density on H49D . -0.39 eA-3  
**PLAT992\_ALERT\_5\_C** Repd & Actual \_reflns\_number\_gt Values Differ by 23 Check

### ● Alert level G

**PLAT002\_ALERT\_2\_G** Number of Distance or Angle Restraints on AtSite 15 Note  
**PLAT003\_ALERT\_2\_G** Number of Uiso or Uij Restrained non-H Atoms ... 20 Report  
**PLAT172\_ALERT\_4\_G** The CIF-Embedded .res File Contains DFIX Records 3  
 Report  
**PLAT173\_ALERT\_4\_G** The CIF-Embedded .res File Contains DANG Records 3  
 Report  
**PLAT177\_ALERT\_4\_G** The CIF-Embedded .res File Contains DELU Records 2  
 Report  
**PLAT178\_ALERT\_4\_G** The CIF-Embedded .res File Contains SIMU Records 2  
 Report  
**PLAT188\_ALERT\_3\_G** A Non-default SIMU Restraint Value has been used 0.0100  
 Report



Synchrotron Radiation); however, if you intend to submit to *Acta Crystallographica Section C* or *E* or *IUCrData*, you should make sure that **full publication checks** are run on the final version of your CIF prior to submission.

### Publication of your CIF in other journals

Please refer to the *Notes for Authors* of the relevant journal for any special instructions relating to CIF submission.

---

**PLATON version of 28/11/2022; check.def file version of 28/11/2022**

## Datablock Pil\_TF1\_ButBr2 - ellipsoid plot

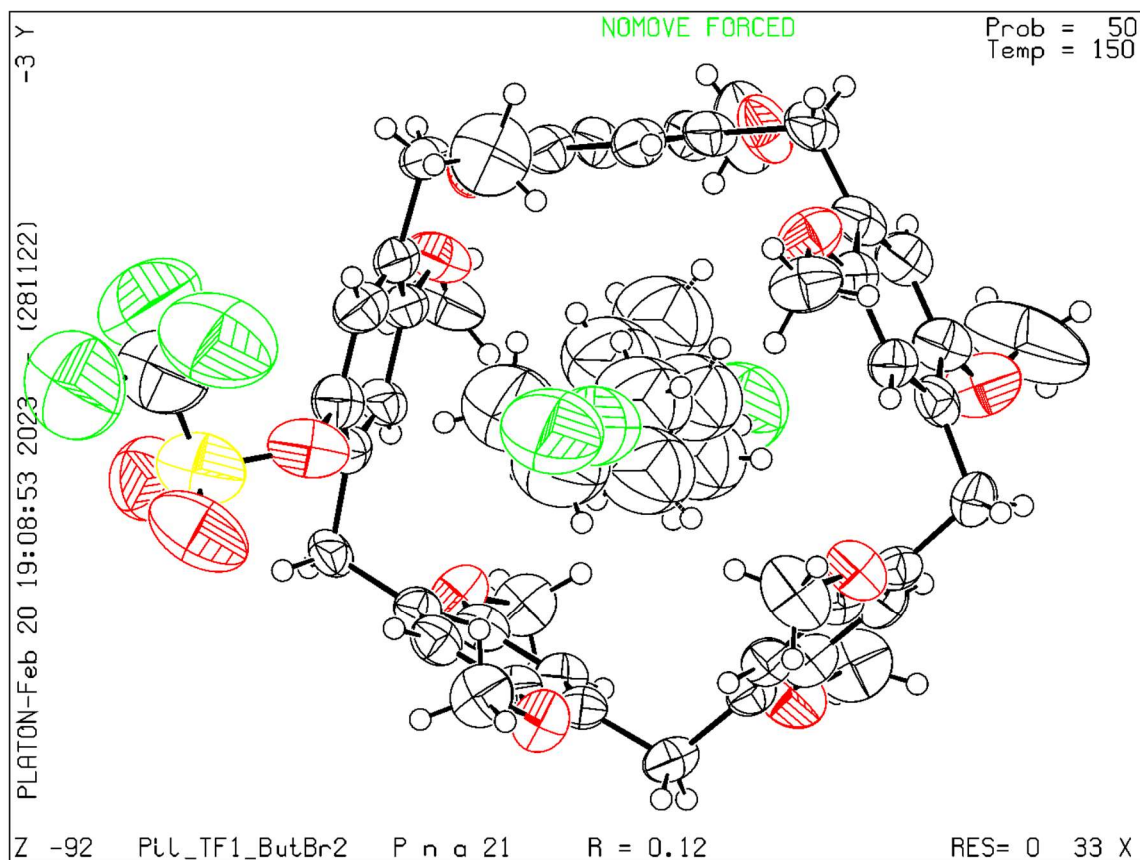

# CheckCIF of Pil\_TF1\_Hex

## checkCIF (basic structural check) running

---

Checking for embedded fcf data in CIF ...

Found embedded fcf data in CIF. Extracting fcf data from uploaded CIF, please wait . . . . .

## checkCIF/PLATON (basic structural check)

---

Structure factors have been supplied for datablock(s) Pil\_TF1\_Hex

THIS REPORT IS FOR GUIDANCE ONLY. IF USED AS PART OF A REVIEW PROCEDURE FOR PUBLICATION, IT SHOULD NOT REPLACE THE EXPERTISE OF AN EXPERIENCED CRYSTALLOGRAPHIC REFEREE.

No syntax errors found. [CIF dictionary](#)

Please wait while processing .... [Interpreting this report](#)

[Structure factor report](#)

## Datablock: Pil\_TF1\_Hex

---

|                        |                                            |                    |
|------------------------|--------------------------------------------|--------------------|
| Bond precision:        | C-C = 0.0088 Å                             | Wavelength=1.54178 |
| Cell:                  | a=36.5154 (14) b=12.1508 (5) c=11.4520 (4) |                    |
|                        | alpha=90 beta=90 gamma=90                  |                    |
| Temperature:           | 150 K                                      |                    |
|                        | Calculated                                 | Reported           |
| Volume                 | 5081.2 (3)                                 | 5081.2 (3)         |
| Space group            | P n a 21                                   | P n a 21           |
| Hall group             | P 2c -2n                                   | P 2c -2n           |
| Moiety formula         | C45 H47 F3 O12 S, C6 H14                   | ?                  |
| Sum formula            | C51 H61 F3 O12 S                           | C51 H61 F3 O12 S   |
| Mr                     | 955.06                                     | 955.05             |
| Dx, g cm <sup>-3</sup> | 1.248                                      | 1.248              |
| Z                      | 4                                          | 4                  |
| Mu (mm <sup>-1</sup> ) | 1.160                                      | 1.160              |
| F000                   | 2024.0                                     | 2024.0             |
| F000'                  | 2032.05                                    |                    |
| h, k, lmax             | 43, 14, 13                                 | 43, 14, 13         |
| Nref                   | 8982 [ 4739]                               | 7710               |



Tmin,Tmax 0.789,0.870 0.790,0.840  
Tmin' 0.784  
Correction method= # Reported T Limits: Tmin=0.790  
Tmax=0.840 AbsCorr = MULTI-SCAN  
Data completeness= 1.63/0.86 Theta(max)= 66.617  
R(reflections)= 0.0731( 7322) wR2(reflections)=  
0.2155( 7710)  
S = 0.999 Npar= 615

The following ALERTS were generated. Each ALERT has the format

**test-name\_ALERT\_alert-type\_alert-level.**

Click on the hyperlinks for more details of the test.

### ● Alert level C

PLAT220\_ALERT\_2\_C NonSolvent Resd 1 C Ueq(max)/Ueq(min) Range 4.0  
Ratio  
PLAT241\_ALERT\_2\_C High 'MainMol' Ueq as Compared to Neighbors of O11  
Check  
PLAT242\_ALERT\_2\_C Low 'MainMol' Ueq as Compared to Neighbors of O1 Check  
PLAT242\_ALERT\_2\_C Low 'MainMol' Ueq as Compared to Neighbors of O6 Check  
PLAT250\_ALERT\_2\_C Large U3/U1 Ratio for Average U(i,j) Tensor ... 3.3 Note  
PLAT260\_ALERT\_2\_C Large Average Ueq of Residue Including C46 0.280 Check  
PLAT340\_ALERT\_3\_C Low Bond Precision on C-C Bonds ..... 0.00882 Ang.  
PLAT601\_ALERT\_2\_C Unit Cell Contains Solvent Accessible VOIDS of . 42 Ang\*\*3  
PLAT911\_ALERT\_3\_C Missing FCF Refl Between Thmin & STh/L= 0.595 7  
Report

### ● Alert level G

PLAT002\_ALERT\_2\_G Number of Distance or Angle Restraints on AtSite 11 Note  
PLAT003\_ALERT\_2\_G Number of Uiso or Uij Restrained non-H Atoms ... 15 Report  
PLAT172\_ALERT\_4\_G The CIF-Embedded .res File Contains DFIX Records 1  
Report  
PLAT173\_ALERT\_4\_G The CIF-Embedded .res File Contains DANG Records 1  
Report  
PLAT176\_ALERT\_4\_G The CIF-Embedded .res File Contains SADI Records 3  
Report  
PLAT177\_ALERT\_4\_G The CIF-Embedded .res File Contains DELU Records 3  
Report  
PLAT178\_ALERT\_4\_G The CIF-Embedded .res File Contains SIMU Records 3  
Report  
PLAT188\_ALERT\_3\_G A Non-default SIMU Restraint Value has been used 0.0100  
Report

#### And 2 other PLAT188 Alerts

More ...

PLAT192\_ALERT\_3\_G A Non-default DELU Restraint Value for First Par 0.0050 Report  
PLAT230\_ALERT\_2\_G Hirshfeld Test Diff for S1A --O1 . 6.7 s.u.

#### And 5 other PLAT230 Alerts

More ...

PLAT301\_ALERT\_3\_G Main Residue Disorder .....(Resd 1 ) 2% Note

|                   |                                                  |              |
|-------------------|--------------------------------------------------|--------------|
| PLAT395_ALERT_2_G | Deviating X-O-Y Angle From 120 for O1            | 22.3 Degree  |
| PLAT860_ALERT_3_G | Number of Least-Squares Restraints .....         | 127 Note     |
| PLAT883_ALERT_1_G | No Info/Value for _atom_sites_solution_primary   | Please Do !  |
| PLAT909_ALERT_3_G | Percentage of I>2sig(I) Data at Theta(Max) Still | 86% Note     |
| PLAT915_ALERT_3_G | No Flack x Check Done: Low Friedel Pair Coverage | 70 %         |
| PLAT965_ALERT_2_G | The SHELXL WEIGHT Optimisation has not Converged | Please Check |
| PLAT978_ALERT_2_G | Number C-C Bonds with Positive Residual Density. | 2 Info       |

---

0 **ALERT level A** = Most likely a serious problem - resolve or explain  
 0 **ALERT level B** = A potentially serious problem, consider carefully  
 9 **ALERT level C** = Check. Ensure it is not caused by an omission or oversight  
 25 **ALERT level G** = General information/check it is not something unexpected

1 ALERT type 1 CIF construction/syntax error, inconsistent or missing data  
 18 ALERT type 2 Indicator that the structure model may be wrong or deficient  
 10 ALERT type 3 Indicator that the structure quality may be low  
 5 ALERT type 4 Improvement, methodology, query or suggestion  
 0 ALERT type 5 Informative message, check

---

It is advisable to attempt to resolve as many as possible of the alerts in all categories. Often the minor alerts point to easily fixed oversights, errors and omissions in your CIF or refinement strategy, so attention to these fine details can be worthwhile. In order to resolve some of the more serious problems it may be necessary to carry out additional measurements or structure refinements. However, the purpose of your study may justify the reported deviations and the more serious of these should normally be commented upon in the discussion or experimental section of a paper or in the "special\_details" fields of the CIF. checkCIF was carefully designed to identify outliers and unusual parameters, but every test has its limitations and alerts that are not important in a particular case may appear. Conversely, the absence of alerts does not guarantee there are no aspects of the results needing attention. It is up to the individual to critically assess their own results and, if necessary, seek expert advice.

### Publication of your CIF in IUCr journals

A basic structural check has been run on your CIF. These basic checks will be run on all CIFs submitted for publication in IUCr journals (*Acta Crystallographica*, *Journal of Applied Crystallography*, *Journal of Synchrotron Radiation*); however, if you intend to submit to *Acta Crystallographica Section C* or *E* or *IUCrData*, you should make sure that **full publication checks** are run on the final version of your CIF prior to submission.

### Publication of your CIF in other journals

Please refer to the *Notes for Authors* of the relevant journal for any special instructions relating to CIF submission.

---

**PLATON version of 28/11/2022; check.def file version of 28/11/2022**

## Datablock Pil\_TF1\_Hex - ellipsoid plot



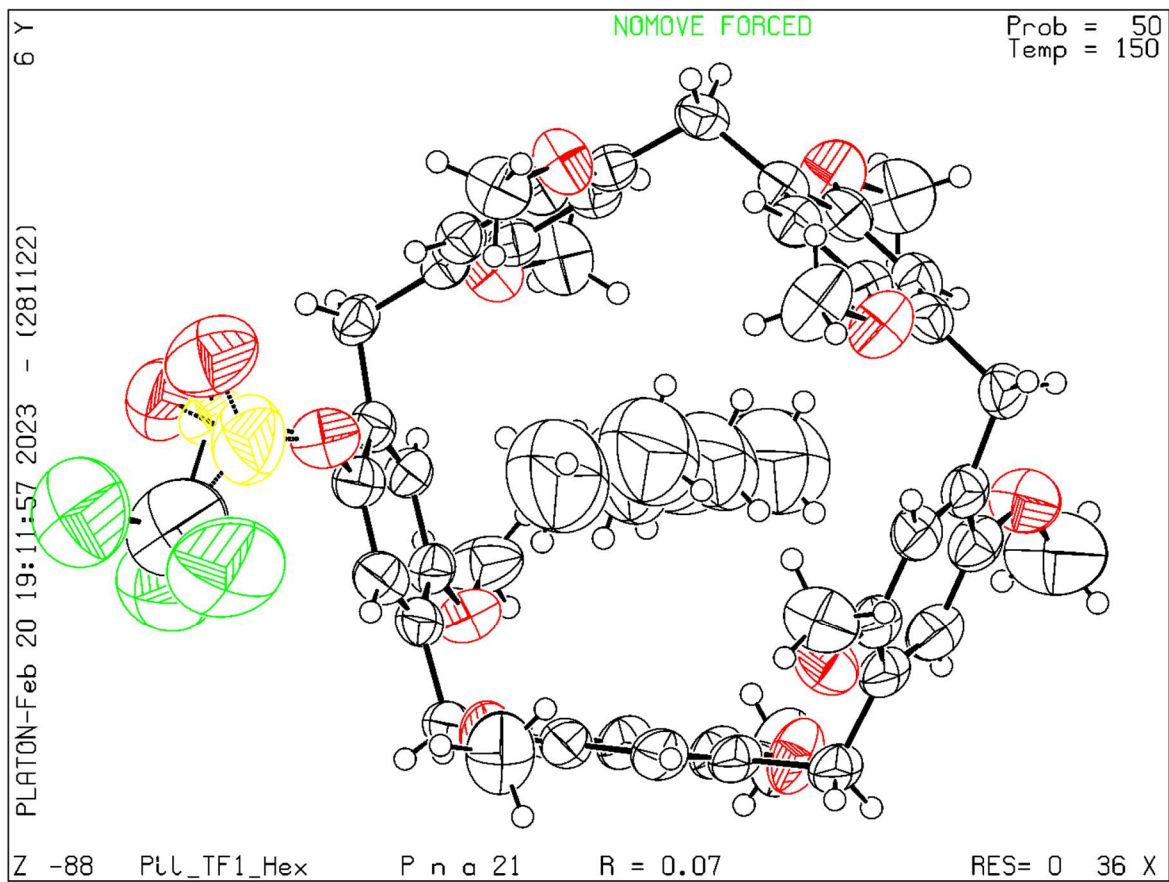

# CheckCIF of Pil\_TF2\_ButBr2

## checkCIF (basic structural check) running

---

Checking for embedded fcf data in CIF ...

Found embedded fcf data in CIF. Extracting fcf data from uploaded CIF, please wait . . . .

## checkCIF/PLATON (basic structural check)

---

Structure factors have been supplied for datablock(s) Pil\_TF2\_ButBr2

THIS REPORT IS FOR GUIDANCE ONLY. IF USED AS PART OF A REVIEW PROCEDURE FOR PUBLICATION, IT SHOULD NOT REPLACE THE EXPERTISE OF AN EXPERIENCED CRYSTALLOGRAPHIC REFEREE.

No syntax errors found. [CIF dictionary](#)

Please wait while processing .... [Interpreting this report](#)  
[Structure factor report](#)

## Datablock: Pil\_TF2\_ButBr2

---

|                        |                                        |                       |
|------------------------|----------------------------------------|-----------------------|
| Bond precision:        | C-C = 0.0075 Å                         | Wavelength=0.71075    |
| Cell:                  | a=18.4426(10) b=18.580(1) c=15.8047(7) |                       |
|                        | alpha=90 beta=98.962(7) gamma=90       |                       |
| Temperature:           | 150 K                                  |                       |
|                        | Calculated                             | Reported              |
| Volume                 | 5349.6(5)                              | 5349.6(5)             |
| Space group            | P 21/c                                 | P 21/c                |
| Hall group             | -P 2ybc                                | -P 2ybc               |
| Moiety formula         | C45 H44 F6 O14 S2, C4 H8 Br2           | ?                     |
| Sum formula            | C49 H52 Br2 F6 O14 S2                  | C49 H52 Br2 F6 O14 S2 |
| Mr                     | 1202.83                                | 1202.84               |
| Dx, g cm <sup>-3</sup> | 1.493                                  | 1.493                 |
| Z                      | 4                                      | 4                     |
| Mu (mm <sup>-1</sup> ) | 1.677                                  | 1.677                 |
| F000                   | 2456.0                                 | 2456.0                |
| F000'                  | 2456.15                                |                       |
| h, k, lmax             | 21, 22, 18                             | 21, 22, 18            |
| Nref                   | 9456                                   | 9339                  |
| Tmin, Tmax             | 0.722, 0.765                           | 0.720, 0.790          |

Tmin' 0.708  
 Correction method= # Reported T Limits: Tmin=0.720  
 Tmax=0.790 AbsCorr = MULTI-SCAN  
 Data completeness= 0.988 Theta(max)= 25.040  
 R(reflections)= 0.0947( 5489) wR2(reflections)=  
 0.3210( 9339)  
 S = 1.040 Npar= 741

The following ALERTS were generated. Each ALERT has the format  
**test-name\_ALERT\_alert-type\_alert-level**.  
 Click on the hyperlinks for more details of the test.

### ● Alert level B

[PLAT910\\_ALERT\\_3\\_B](#) Missing # of FCF Reflection(s) Below Theta(Min). 18 Note

### ● Alert level C

[PLAT084\\_ALERT\\_3\\_C](#) High wR2 Value (i.e. > 0.25) ..... 0.32 Report  
[PLAT094\\_ALERT\\_2\\_C](#) Ratio of Maximum / Minimum Residual Density .... 2.16  
 Report  
[PLAT213\\_ALERT\\_2\\_C](#) Atom F5 has ADP max/min Ratio ..... 3.2 oblate  
[PLAT220\\_ALERT\\_2\\_C](#) NonSolvent Resd 1 C Ueq(max)/Ueq(min) Range 3.5  
 Ratio  
[PLAT230\\_ALERT\\_2\\_C](#) Hirshfeld Test Diff for S1 --C36 . 5.3 s.u.  
[PLAT234\\_ALERT\\_4\\_C](#) Large Hirshfeld Difference S2A --C37 . 0.16 Ang.  
[PLAT234\\_ALERT\\_4\\_C](#) Large Hirshfeld Difference F5 --C37 . 0.19 Ang.  
[PLAT241\\_ALERT\\_2\\_C](#) High 'MainMol' Ueq as Compared to Neighbors of F4 Check  
[PLAT241\\_ALERT\\_2\\_C](#) High 'MainMol' Ueq as Compared to Neighbors of O1 Check  
[PLAT242\\_ALERT\\_2\\_C](#) Low 'MainMol' Ueq as Compared to Neighbors of S1 Check  
[PLAT242\\_ALERT\\_2\\_C](#) Low 'MainMol' Ueq as Compared to Neighbors of O10  
 Check  
[PLAT250\\_ALERT\\_2\\_C](#) Large U3/U1 Ratio for Average U(i,j) Tensor .... 2.2 Note  
[PLAT250\\_ALERT\\_2\\_C](#) Large U3/U1 Ratio for Average U(i,j) Tensor .... 2.1 Note  
[PLAT260\\_ALERT\\_2\\_C](#) Large Average Ueq of Residue Including Br1A 0.191 Check  
[PLAT260\\_ALERT\\_2\\_C](#) Large Average Ueq of Residue Including Br1B 0.206 Check  
[PLAT341\\_ALERT\\_3\\_C](#) Low Bond Precision on C-C Bonds ..... 0.0075 Ang.  
[PLAT906\\_ALERT\\_3\\_C](#) Large K Value in the Analysis of Variance ..... 7.601 Check  
[PLAT906\\_ALERT\\_3\\_C](#) Large K Value in the Analysis of Variance ..... 2.129 Check  
[PLAT911\\_ALERT\\_3\\_C](#) Missing FCF Refl Between Thmin & STh/L= 0.595 98  
 Report  
[PLAT918\\_ALERT\\_3\\_C](#) Reflection(s) with I(obs) much Smaller I(calc) . 2 Check

### ● Alert level G

[PLAT002\\_ALERT\\_2\\_G](#) Number of Distance or Angle Restraints on AtSite 18 Note  
[PLAT003\\_ALERT\\_2\\_G](#) Number of Uiso or Uij Restrained non-H Atoms ... 21 Report  
[PLAT172\\_ALERT\\_4\\_G](#) The CIF-Embedded .res File Contains DFIX Records 3  
 Report  
[PLAT173\\_ALERT\\_4\\_G](#) The CIF-Embedded .res File Contains DANG Records 2  
 Report



---

It is advisable to attempt to resolve as many as possible of the alerts in all categories. Often the minor alerts point to easily fixed oversights, errors and omissions in your CIF or refinement strategy, so attention to these fine details can be worthwhile. In order to resolve some of the more serious problems it may be necessary to carry out additional measurements or structure refinements. However, the purpose of your study may justify the reported deviations and the more serious of these should normally be commented upon in the discussion or experimental section of a paper or in the "special\_details" fields of the CIF. checkCIF was carefully designed to identify outliers and unusual parameters, but every test has its limitations and alerts that are not important in a particular case may appear. Conversely, the absence of alerts does not guarantee there are no aspects of the results needing attention. It is up to the individual to critically assess their own results and, if necessary, seek expert advice.

### **Publication of your CIF in IUCr journals**

A basic structural check has been run on your CIF. These basic checks will be run on all CIFs submitted for publication in IUCr journals (*Acta Crystallographica*, *Journal of Applied Crystallography*, *Journal of Synchrotron Radiation*); however, if you intend to submit to *Acta Crystallographica Section C* or *E* or *IUCrData*, you should make sure that **full publication checks** are run on the final version of your CIF prior to submission.

### **Publication of your CIF in other journals**

Please refer to the *Notes for Authors* of the relevant journal for any special instructions relating to CIF submission.

---

**PLATON version of 28/11/2022; check.def file version of 28/11/2022**

## **Datablock Pil\_TF2\_ButBr2 - ellipsoid plot**

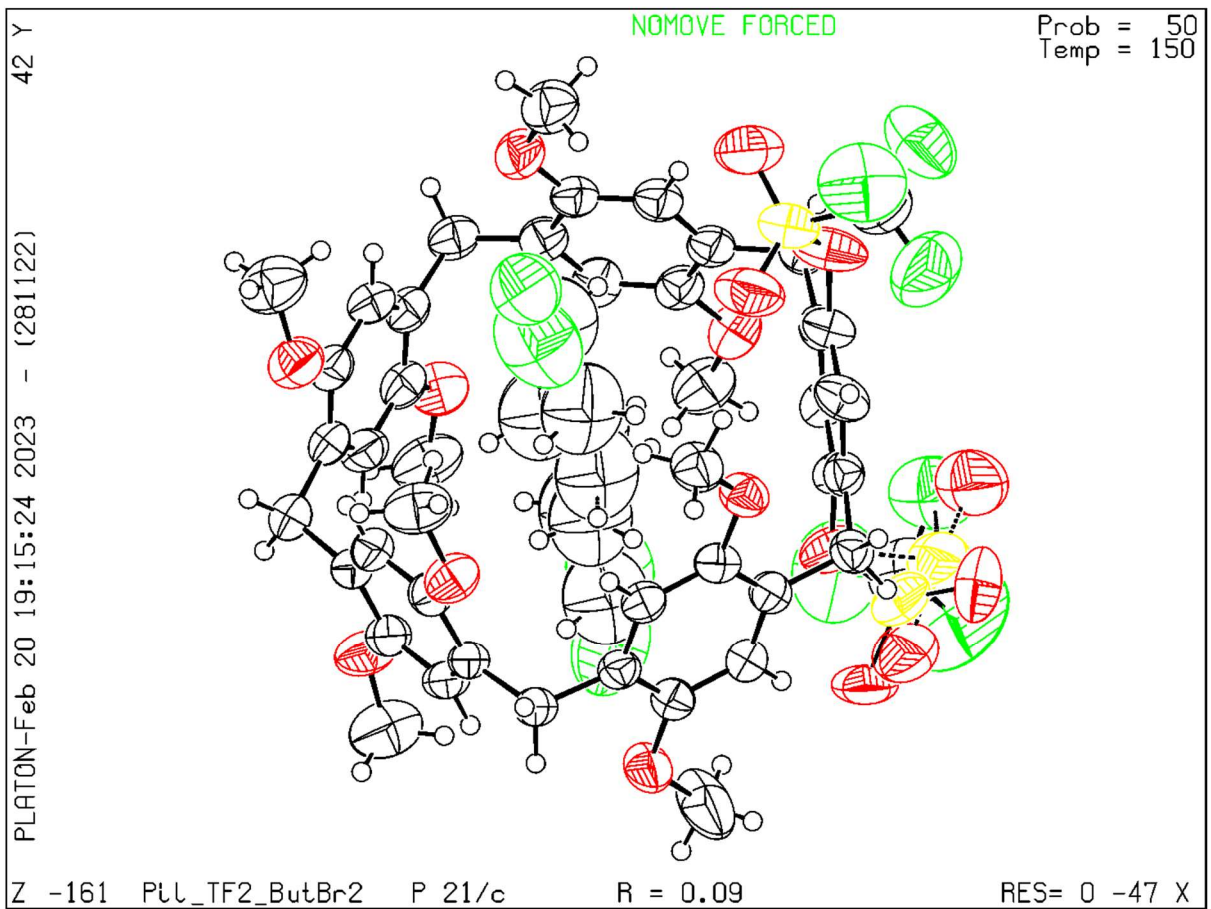

# CheckCIF of Pil\_TF2\_Hex

## checkCIF (basic structural check) running

---

Checking for embedded fcf data in CIF ...

Found embedded fcf data in CIF. Extracting fcf data from uploaded CIF, please wait . . . .

## checkCIF/PLATON (basic structural check)

---

Structure factors have been supplied for datablock(s) Pil\_TF2\_Hex

THIS REPORT IS FOR GUIDANCE ONLY. IF USED AS PART OF A REVIEW PROCEDURE FOR PUBLICATION, IT SHOULD NOT REPLACE THE EXPERTISE OF AN EXPERIENCED CRYSTALLOGRAPHIC REFEREE.

No syntax errors found. [CIF dictionary](#)

Please wait while processing .... [Interpreting this report](#)

[Structure factor report](#)

## Datablock: Pil\_TF2\_Hex

---

Bond precision: C-C = 0.0093 Å Wavelength=1.54178

Cell: a=18.1057 (13) b=18.7444 (14) c=15.8021 (11)

alpha=90 beta=99.305 (4) gamma=90

Temperature: 150 K

|                        | Calculated                | Reported          |
|------------------------|---------------------------|-------------------|
| Volume                 | 5292.4 (7)                | 5292.4 (7)        |
| Space group            | P 21/c                    | P 21/c            |
| Hall group             | -P 2ybc                   | -P 2ybc           |
| Moiety formula         | C45 H44 F6 O14 S2, C6 H14 | ?                 |
| Sum formula            | C51 H58 F6 O14 S2         | C51 H58 F6 O14 S2 |
| Mr                     | 1073.09                   | 1073.09           |
| Dx, g cm <sup>-3</sup> | 1.347                     | 1.347             |
| Z                      | 4                         | 4                 |
| Mu (mm <sup>-1</sup> ) | 1.648                     | 1.648             |
| F000                   | 2248.0                    | 2248.0            |
| F000'                  | 2258.65                   |                   |
| h, k, lmax             | 21, 22, 18                | 21, 22, 18        |
| Nref                   | 9354                      | 8995              |
| Tmin, Tmax             | 0.743, 0.756              | 0.710, 0.780      |

Tmin' 0.674  
 Correction method= # Reported T Limits: Tmin=0.710  
 Tmax=0.780 AbsCorr = MULTI-SCAN  
 Data completeness= 0.962 Theta(max)= 66.588  
 R(reflections)= 0.0985( 4711) wR2(reflections)=  
 0.3482( 8995)  
 S = 1.037 Npar= 676

---

The following ALERTS were generated. Each ALERT has the format  
**test-name\_ALERT\_alert-type\_alert-level**.  
 Click on the hyperlinks for more details of the test.

---

### ● Alert level C

[PLAT029\\_ALERT\\_3\\_C](#) \_diffn\_measured\_fraction\_theta\_full value Low . 0.962 Why?  
[PLAT084\\_ALERT\\_3\\_C](#) High wR2 Value (i.e. > 0.25) ..... 0.35 Report  
[PLAT230\\_ALERT\\_2\\_C](#) Hirshfeld Test Diff for S2 --C37 . 5.4 s.u.  
[PLAT234\\_ALERT\\_4\\_C](#) Large Hirshfeld Difference S1B --C36 . 0.16 Ang.

#### And 4 other PLAT234 Alerts

More ...

[PLAT241\\_ALERT\\_2\\_C](#) High 'MainMol' Ueq as Compared to Neighbors of O2 Check

#### And 2 other PLAT241 Alerts

More ...

[PLAT242\\_ALERT\\_2\\_C](#) Low 'MainMol' Ueq as Compared to Neighbors of S2 Check

#### And 2 other PLAT242 Alerts

More ...

[PLAT250\\_ALERT\\_2\\_C](#) Large U3/U1 Ratio for Average U(i,j) Tensor .... 3.1 Note  
[PLAT260\\_ALERT\\_2\\_C](#) Large Average Ueq of Residue Including C46 0.233 Check  
[PLAT340\\_ALERT\\_3\\_C](#) Low Bond Precision on C-C Bonds ..... 0.00927 Ang.  
[PLAT360\\_ALERT\\_2\\_C](#) Short C(sp3)-C(sp3) Bond C47 - C48 . 1.43 Ang.  
[PLAT360\\_ALERT\\_2\\_C](#) Short C(sp3)-C(sp3) Bond C49 - C50 . 1.42 Ang.  
[PLAT905\\_ALERT\\_3\\_C](#) Negative K value in the Analysis of Variance ... -7.785 Report  
[PLAT905\\_ALERT\\_3\\_C](#) Negative K value in the Analysis of Variance ... -0.052 Report  
[PLAT911\\_ALERT\\_3\\_C](#) Missing FCF Refl Between Thmin & STh/L= 0.595 358  
 Report

### ● Alert level G

[PLAT002\\_ALERT\\_2\\_G](#) Number of Distance or Angle Restraints on AtSite 10 Note  
[PLAT003\\_ALERT\\_2\\_G](#) Number of Uiso or Uij Restrained non-H Atoms ... 10 Report  
[PLAT083\\_ALERT\\_2\\_G](#) SHELXL Second Parameter in WGHT Unusually Large 5.18  
 Why ?  
[PLAT172\\_ALERT\\_4\\_G](#) The CIF-Embedded .res File Contains DFIX Records 1  
 Report  
[PLAT173\\_ALERT\\_4\\_G](#) The CIF-Embedded .res File Contains DANG Records 1  
 Report  
[PLAT176\\_ALERT\\_4\\_G](#) The CIF-Embedded .res File Contains SADI Records 1  
 Report  
[PLAT177\\_ALERT\\_4\\_G](#) The CIF-Embedded .res File Contains DELU Records 2  
 Report



PLAT178\_ALERT\_4\_G The CIF-Embedded .res File Contains SIMU Records 2  
Report

PLAT188\_ALERT\_3\_G A Non-default SIMU Restraint Value has been used 0.0200  
Report

PLAT188\_ALERT\_3\_G A Non-default SIMU Restraint Value has been used 0.0100  
Report

PLAT230\_ALERT\_2\_G Hirshfeld Test Diff for S1B --O11 . 15.4 s.u.  
**And 2 other PLAT230 Alerts**  
More ...

PLAT242\_ALERT\_2\_G Low 'MainMol' Ueq as Compared to Neighbors of C36  
Check

PLAT242\_ALERT\_2\_G Low 'MainMol' Ueq as Compared to Neighbors of C37  
Check

PLAT301\_ALERT\_3\_G Main Residue Disorder .....(Resd 1 ) 1% Note

PLAT395\_ALERT\_2\_G Deviating X-O-Y Angle From 120 for O1 . 6.5 Degree

PLAT860\_ALERT\_3\_G Number of Least-Squares Restraints ..... 89 Note

PLAT883\_ALERT\_1\_G No Info/Value for \_atom\_sites\_solution\_primary . Please Do !

PLAT910\_ALERT\_3\_G Missing # of FCF Reflection(s) Below Theta(Min). 1 Note

PLAT933\_ALERT\_2\_G Number of HKL-OMIT Records in Embedded .res File 3 Note

PLAT941\_ALERT\_3\_G Average HKL Measurement Multiplicity ..... 4.5 Low

PLAT965\_ALERT\_2\_G The SHELXL WEIGHT Optimisation has not Converged Please  
Check

PLAT978\_ALERT\_2\_G Number C-C Bonds with Positive Residual Density. 2 Info

---

0 **ALERT level A** = Most likely a serious problem - resolve or explain  
0 **ALERT level B** = A potentially serious problem, consider carefully  
22 **ALERT level C** = Check. Ensure it is not caused by an omission or oversight  
24 **ALERT level G** = General information/check it is not something unexpected

1 ALERT type 1 CIF construction/syntax error, inconsistent or missing data  
23 ALERT type 2 Indicator that the structure model may be wrong or deficient  
12 ALERT type 3 Indicator that the structure quality may be low  
10 ALERT type 4 Improvement, methodology, query or suggestion  
0 ALERT type 5 Informative message, check

---

It is advisable to attempt to resolve as many as possible of the alerts in all categories. Often the minor alerts point to easily fixed oversights, errors and omissions in your CIF or refinement strategy, so attention to these fine details can be worthwhile. In order to resolve some of the more serious problems it may be necessary to carry out additional measurements or structure refinements. However, the purpose of your study may justify the reported deviations and the more serious of these should normally be commented upon in the discussion or experimental section of a paper or in the "special\_details" fields of the CIF. checkCIF was carefully designed to identify outliers and unusual parameters, but every test has its limitations and alerts that are not important in a particular case may appear. Conversely, the absence of alerts does not guarantee there are no aspects of the results needing attention. It is up to the individual to critically assess their own results and, if necessary, seek expert advice.

### Publication of your CIF in IUCr journals

A basic structural check has been run on your CIF. These basic checks will be run on all CIFs submitted for

publication in IUCr journals (*Acta Crystallographica*, *Journal of Applied Crystallography*, *Journal of Synchrotron Radiation*); however, if you intend to submit to *Acta Crystallographica Section C* or *E* or *IUCrData*, you should make sure that **full publication checks** are run on the final version of your CIF prior to submission.

### Publication of your CIF in other journals

Please refer to the *Notes for Authors* of the relevant journal for any special instructions relating to CIF submission.

---

**PLATON version of 28/11/2022; check.def file version of 28/11/2022**

## Datablock Pil\_TF2\_Hex - ellipsoid plot

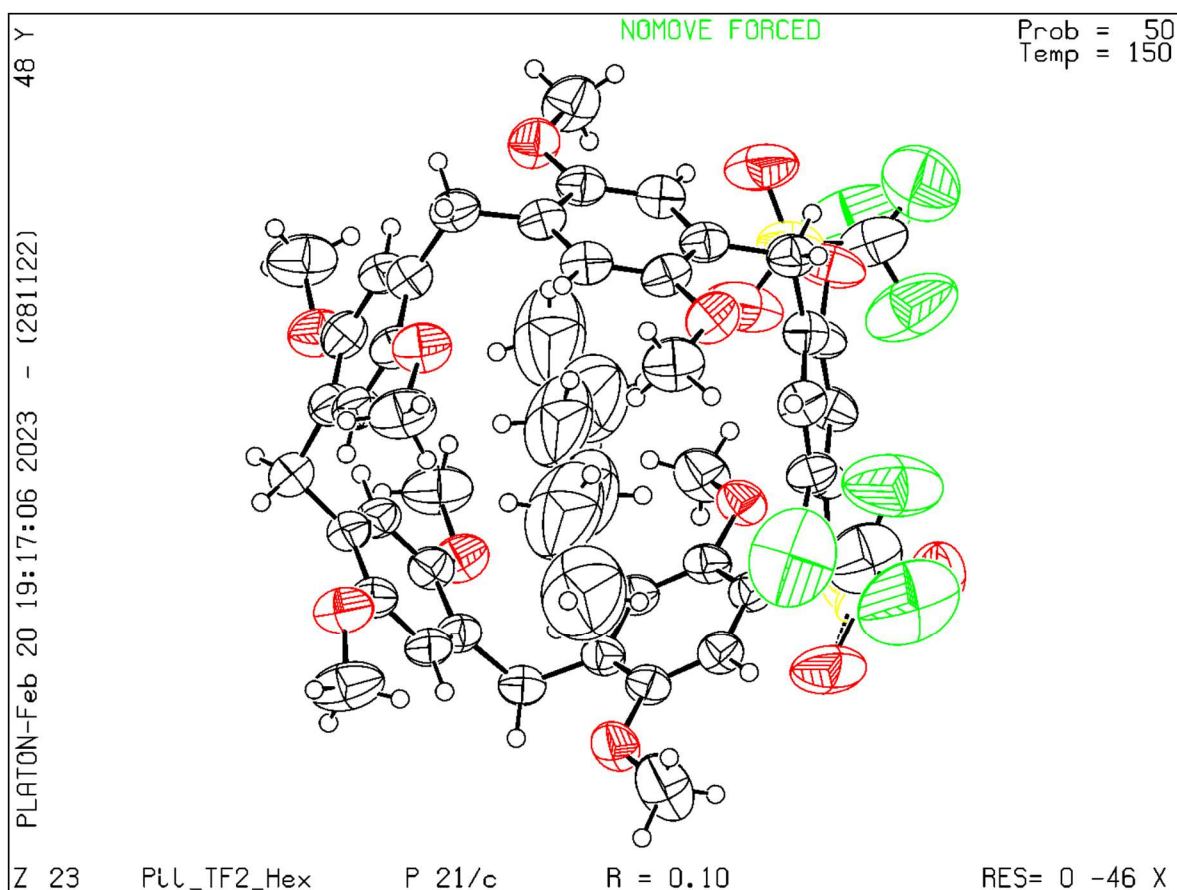

Supplement: s1 [file s1]
